# Supplementary material for: Current Use of Oral Anticoagulation Therapy in Elderly Patients with Atrial Fibrillation: Results from an Italian Multicenter Prospective Study—The ISNEP Study
Source: MDPI journal article supplement (doi:10.3390/jpm12091419), 2022-08-31
Supplement: s1 [file s1]

Supplementary Material Table S1 – LIST OF ISNEP STUDY INVESTIGATORS

| <b>REGION of Italy</b> | <b>City</b>              | <b>Surname</b> | <b>Name</b> |
|------------------------|--------------------------|----------------|-------------|
| Campania               | Castel Volturno, Caserta | Marullo        | Luciano     |
| Campania               | Maddaloni, Caserta       | Severino       | Salvatore   |
| Campania               | Acerra, Naples           | Sidiropulos    | Milena      |
| LOMBARDIA              | Gardone Riviera, Brescia | Chimini        | Claudio     |
| LOMBARDIA              | Milan                    | Colombo        | Chiara      |
| MARCHE                 | Ancona                   | Antonicelli    | Roberto     |
| MARCHE                 | Jesi, Ancona             | Boria          | Cesare      |
| Piemonte               | Piossasco, Turin         | Micanti        | Alex        |
| SICILIA                | Palermo                  | Rebulla        | Eduardo     |
| SICILIA                | Ragusa                   | Miano          | Marco       |
| TOSCANA                | Florence                 | Bamoshmoosh    | Mohamed     |
